# Supplementary material for: An Arabic Sedentary Behaviors Questionnaire (ASBQ): Development, Content Validation, and Pre-Testing Findings
Source: MDPI journal article supplement (doi:10.3390/bs12060183), 2022-06-08
Supplement: s1 [file s1]

**Table S1. Detailed description of the characteristics of the searched studies.**

| ID | Questionnaire Name                                       | Questionnaire abbreviation | Authors, year                     | # items                                                                | population                           |        |                                         |                                                           | Sample size         | Note                                                     |
|----|----------------------------------------------------------|----------------------------|-----------------------------------|------------------------------------------------------------------------|--------------------------------------|--------|-----------------------------------------|-----------------------------------------------------------|---------------------|----------------------------------------------------------|
|    |                                                          |                            |                                   |                                                                        | Age                                  | Gender | Condition                               | Country                                                   |                     |                                                          |
| 1  | Adult Sedentary Behavior Questionnaire                   | ASBQ                       | Chu, et al., 2018 (ref # 36)      | 7                                                                      | 21–65 years                          | Both   | English-literate healthy adult          | Singaporean adults of Chinese, Malay, & Indians ethnicity | 84                  | Against single item GPAQ, accelerometer ADAPTED from SBQ |
| 2  | Adolescent Sedentary Activity Questionnaire              | ASAQ                       | Hardy, et al., 2007 (ref #44)     |                                                                        | 11 -15 years                         | Both   | school classes of adolescents           | Australia                                                 | 250                 | none                                                     |
| 3  | Time spent sitting on weekdays and weekend days          | Daily SB                   | Marshall, et al., 2010 (ref # 31) | 5: Traveling, at work, TV viewing, computer use for home & for leisure | 51-59 years women<br>45-63 years men | Both   | healthy adults                          | Australia                                                 | 157 women<br>96 men | gender-specific test-retest reliability and validity     |
| 4  | Occupational sitting, standing, & physical activity time | OSPAQ                      | Chau, et al., 2012 (ref # 29)     | 6                                                                      | > 18 years                           | Both   | English-literate healthy adults         | Australia                                                 | 99                  | Against accelerometer                                    |
| 5  | Physical Activity and Sedentary Behaviour Questionnaire  | PASB-Q                     | Fowles, et al., 2017 (ref # 41)   | 7                                                                      | > 18 years                           | Both   | healthy                                 | Canada                                                    | 35                  | Against accelerometer                                    |
| 6  | Past-day Adults' Sedentary Time                          | PAST                       | Clark, et al., 2013 (ref # 30)    | 7                                                                      | 18 – 75 years                        | female | diagnosed with breast cancer (stages I– | Australia                                                 | 90                  | Against inclinometer and accelerometer                   |

|                   |                                                      |          |                                                                               |             |               |      |                               |              |           |                                                |
|-------------------|------------------------------------------------------|----------|-------------------------------------------------------------------------------|-------------|---------------|------|-------------------------------|--------------|-----------|------------------------------------------------|
|                   |                                                      |          |                                                                               |             |               |      | III), BMI 25 - 40             |              |           |                                                |
| <b>7</b>          | Sedentary Behavior Questionnaire                     | SBQ      | Rosenberg, et al., 2010 (ref # 32)                                            | 9           | > 18          | Both | Healthy or overweight & obese | USA          | 49 + 842  | Against IPAQ and accelerometer                 |
| <b>8</b>          | SIT-Q                                                | SIT-Q    | Lynch, et al., 2014 (ref # 46)                                                | 7 sections  | 30-60 years   | Both | Healthy, BMI > 35             | Canada       | 82        | Against 7-Day activity diary                   |
| <b>9 &amp; 10</b> | last 7-d sedentary behavior questionnaire            | SIT-Q-7d | Felez-Nobrega M, et al, 2019 (ref # 40) & Wijndael e, et al., 2014 (ref # 33) | 5 sections  | 20-60 & 40-65 | Both | Healthy, at risk for diabetes | Belgium & UK | 51 + 402  | Against ActivPAL, Actiheart Adapted from SIT-Q |
| <b>11</b>         | Sedentary Time and Activity Reporting Questionnaire  | STAR-Q   | Csizmadi, et al., 2014 (ref # 37)                                             | 15 sections | 30-60 years   | Both | Healthy, BMI > 35             | Canada       | 91        | Against 7-Day activity diary                   |
| <b>12</b>         | Sedentary, Transportation and Activity Questionnaire | STAQ     | Mensah, et al., 2016 (ref # 48)                                               | 5 sections  | 20- 65 years  | Both | healthy                       | France       | 96        | Against accelerometer                          |
| <b>13</b>         | Modified Worker's Living Activity-time Questionnaire | mWALQ    | Matsuo, et al., 2020 (ref # 47)                                               | 15          | 30-60 years   | Both | Healthy working adults        | Japan        | 198       | Against VO2max measurement                     |
| <b>14</b>         | Youth Leisure-time Sedentary Behavior Questionnaire  | YLSBQ    | Cabanas-Sánchez, et al.,                                                      | 15          | 11-15 years   | Both | Healthy, school classes of    | Spain        | 208, 1638 | Against accelerometer                          |

|           |                                                                                        |             |                                     |                                            |                                  |      |                                            |                                                               |                                       |                                    |
|-----------|----------------------------------------------------------------------------------------|-------------|-------------------------------------|--------------------------------------------|----------------------------------|------|--------------------------------------------|---------------------------------------------------------------|---------------------------------------|------------------------------------|
|           |                                                                                        |             | 2018 (ref # 35)                     |                                            |                                  |      | adolescent<br>s                            |                                                               |                                       |                                    |
| <b>15</b> | Self-Administered Physical Activity Checklist                                          | 3-Day SAPAC | Affuso, et al., 2011 (ref # 34)     |                                            | 11-15 years                      | Both | Healthy, school classes of adolescent<br>s | USA                                                           | 224                                   | Against accelerometer              |
| <b>16</b> | Physical Activity and Sedentary Behavior Assessment Questionnaire                      | PASBAQ      | Scholes, et al., 2013 (ref # 49 )   | 4 domains                                  | ≥16 years                        | Both | living in English households               | UK                                                            | 2175                                  | Against accelerometer              |
| <b>17</b> | Multimedia Activity Recall for Children and Adults                                     | MARCA       | Gomersall, et al., 2015 (ref # 42)  | 7 categories                               | -                                | Both | healthy                                    | Australia                                                     | 58                                    | Against ActivPAL                   |
| <b>18</b> | Transtheoretical Model questionnaire for sedentary behaviors                           | TTM         | Han, et al., 2015 (ref # 43)        | 10 processes of change (40 items)          | 18 – 24 years                    | Both | College students                           | USA                                                           | 225                                   | Against accelerometer              |
| <b>19</b> | Multicontext Sitting Time Questionnaire                                                | MSTQ        | Whitfield , et al., 2013 (ref # 50) | 7 domains for working and non-working time | Mean (sd) = 34.5 (7.7)           | Both | Recreational runners                       | USA                                                           | 25                                    | ActiGraph GT1M accelerometer       |
| <b>20</b> | South American Youth Cardiovascular and Environmental sedentary behavior questionnaire | SAYCARE     | De Moraes, et al., 2020 (ref # 38)  | 4 domains                                  | Childre: 3-10 Adolescents: 11-18 | Both | Healthy school children                    | SAmerica (Argentina, Peru, Colombia, Uruguay, Chile & Brazil) | 400 for both validity and reliability | Validity was Against accelerometer |
| <b>21</b> | TAXonomy of Self-report SB Tools                                                       | TASST       | Dontje, et al.,                     | 4 domains                                  | 65 + years                       | Both | Elderly                                    | United Kingdom                                                | 18                                    | activPAL 3c                        |

|           |                                      |           |                                |           |                         |      |          |         |            |                                  |
|-----------|--------------------------------------|-----------|--------------------------------|-----------|-------------------------|------|----------|---------|------------|----------------------------------|
|           |                                      |           | 2018 (ref # 39)                |           |                         |      |          |         |            |                                  |
| <b>22</b> | Child screen media use questionnaire | SCREENS-Q | Klakk, et al., 2020 (ref # 45) | 6 domains | 6 –10-year old children | Both | Children | Denmark | 37 parents | Content validity and reliability |
