# Supplementary material for: An Arabic Sedentary Behaviors Questionnaire (ASBQ): Development, Content Validation, and Pre-Testing Findings
Source: MDPI journal article supplement (doi:10.3390/bs12060183), 2022-06-08
Supplement: s1 [file s1]

**Table S3. English translation of Arabic Sedentary Behavior Questionnaire (ASBQ)**

Sedentary behaviors are any waking behavior that involves sitting, lying or reclining position. When asked about sedentary behaviors, you must think about behaviors that meet these characteristics. **For those who are working or students, kindly answer both sections 1 and 2. For those who are unemployed or retired answer section 2 only.**

**Section 1:**

- **During SCHOOL/WORK HOURS**, How many hours per day do you spend sitting **during school/work hours**?  
Respond thinking about the **average** time you spend during a typical (usual) week.

|                                                                                |                        |
|--------------------------------------------------------------------------------|------------------------|
| 1. How many <b>days per week</b> do you typically <b>go to</b> work or school? | [    ] days            |
| 2. How many <b>hours per day</b> do you spend sitting while at work or school? | [    ] hrs. [    ] min |

**Section 2:**

- **How long have you been engaged in the following behaviors during weekdays or weekends?**

Respond to the following questions thinking about AVERAGE time you spend on each activity during a typical (usual) weekdays or weekends. **Each period of sitting down should only be entered once.** For example, if you spent one hour sitting on the sofa reading a book while you were listening to music, count this time as one hour reading if this was your main activity. Do not count this as one hour reading a book and another hour listening to music.

| How many hours and min per day you spend <b>sitting, lying or reclining while:</b>                              | During weekdays                                | During weekends                        |
|-----------------------------------------------------------------------------------------------------------------|------------------------------------------------|----------------------------------------|
| 3. Watching movies, TV, videos (regardless of the source-TV, computer, phone)                                   | [    ] hrs. [    ] min                         | [    ] hrs. [    ] min                 |
| 4. Playing computer/video games                                                                                 | [    ] hrs. [    ] min                         | [    ] hrs. [    ] min                 |
| 5. Internet surfing or using social media for fun                                                               | [    ] hrs. [    ] min                         | [    ] hrs. [    ] min                 |
| 6. Doing homework/studying                                                                                      | [    ] hrs. [    ] min                         | [    ] hrs. [    ] min                 |
| 7. Reading for fun                                                                                              | [    ] hrs. [    ] min                         | [    ] hrs. [    ] min                 |
| 8. Sitting and talking with family or friends in person or via internet                                         | [    ] hrs. [    ] min                         | [    ] hrs. [    ] min                 |
| 9. Listening to Quran, Radio, or music (without doing anything else)                                            | [    ] hrs. [    ] min                         | [    ] hrs. [    ] min                 |
| 10. Resting (lying down, but not taking a nap, etc.)                                                            | [    ] hrs. [    ] min                         | [    ] hrs. [    ] min                 |
| 11. Doing hobbies that require thinking/reasoning (doing puzzles, playing cards, doing crossword puzzles, etc.) | [    ] hrs. [    ] min                         | [    ] hrs. [    ] min                 |
| 12. Doing crafts or art work <u>while sitting</u> (like drawing, knitting, sewing, etc.)                        | [    ] hrs. [    ] min                         | [    ] hrs. [    ] min                 |
| 13. Using transportation while sitting (in car, bus, train, subway or motorbike)                                | [    ] hrs. [    ] min                         | [    ] hrs. [    ] min                 |
| 14. Doing household tasks <u>while seated</u> (ironing, slicing foods, repairing things)                        | [    ] hrs. [    ] min                         | [    ] hrs. [    ] min                 |
| 15. Engaged in other activities than the above <u>while seated</u> , name them:<br>.....                        | [    ] hrs. [    ] min                         | [    ] hrs. [    ] min                 |
| 16. Typically, how often do you <b>interrupt your sitting</b> time during a typical day in a week?              |                                                |                                        |
| <input type="checkbox"/> every 30 min or less                                                                   | <input type="checkbox"/> every 1 hour          | <input type="checkbox"/> every 2 hours |
| <input type="checkbox"/> every 3 hours                                                                          | <input type="checkbox"/> every 4 hours or more |                                        |

*Thank you for participating in this survey.*
